# Supplementary material for: Stronger effects of simultaneous warming and precipitation increase than the individual factor on soil bacterial community composition and assembly processes in an alpine grassland
Source: Frontiers journal article supplement (doi:10.3389/fmicb.2023.1237850), 2023-08-30
Supplement: Data_Sheet_1.PDF [file Data_Sheet_1.PDF]

## Supplementary Material

### Stronger effects of simultaneous warming and precipitation increase than the individual factor on soil bacterial community composition and assembly processes in an alpine grassland

#### Supplementary Figures

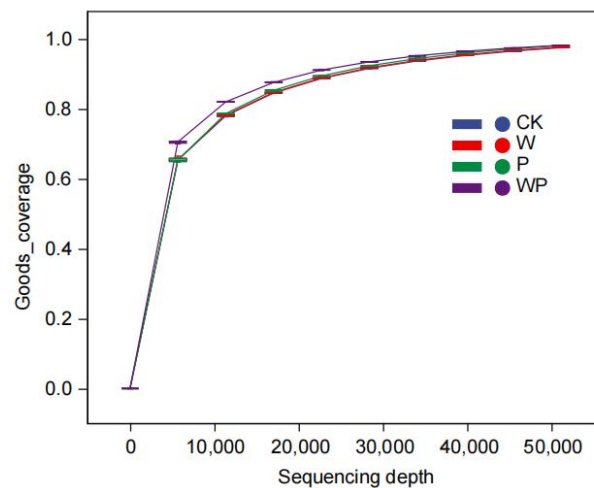

**Supplementary Figure S1.** Rarefaction curves of observed species under different treatments. CK-control, W-warming, P-precipitation increasing, WP-the combination of warming and precipitation increase.

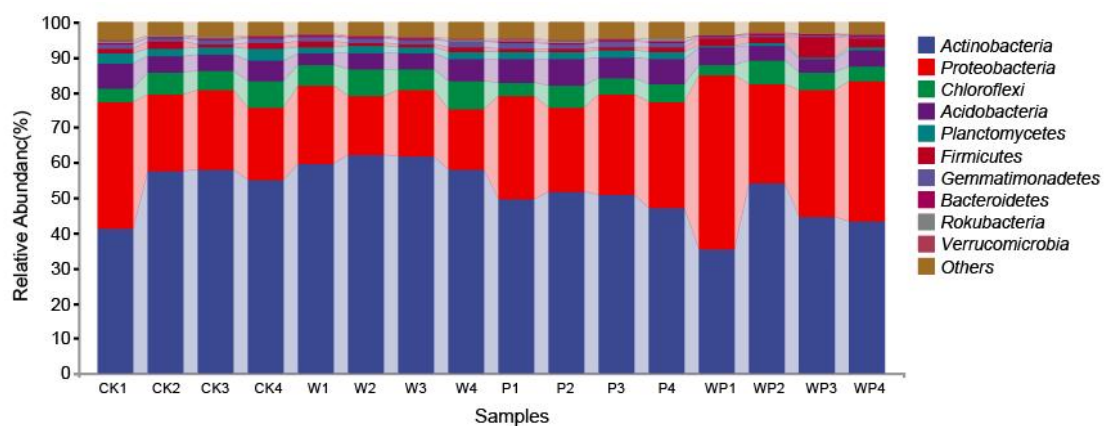

**Supplementary Figure S2.** Relative abundance of bacterial taxon at the phylum level. CK-control, W-warming, P-precipitation increasing, WP-the combination of warming and precipitation increase. The number represents the repetition.

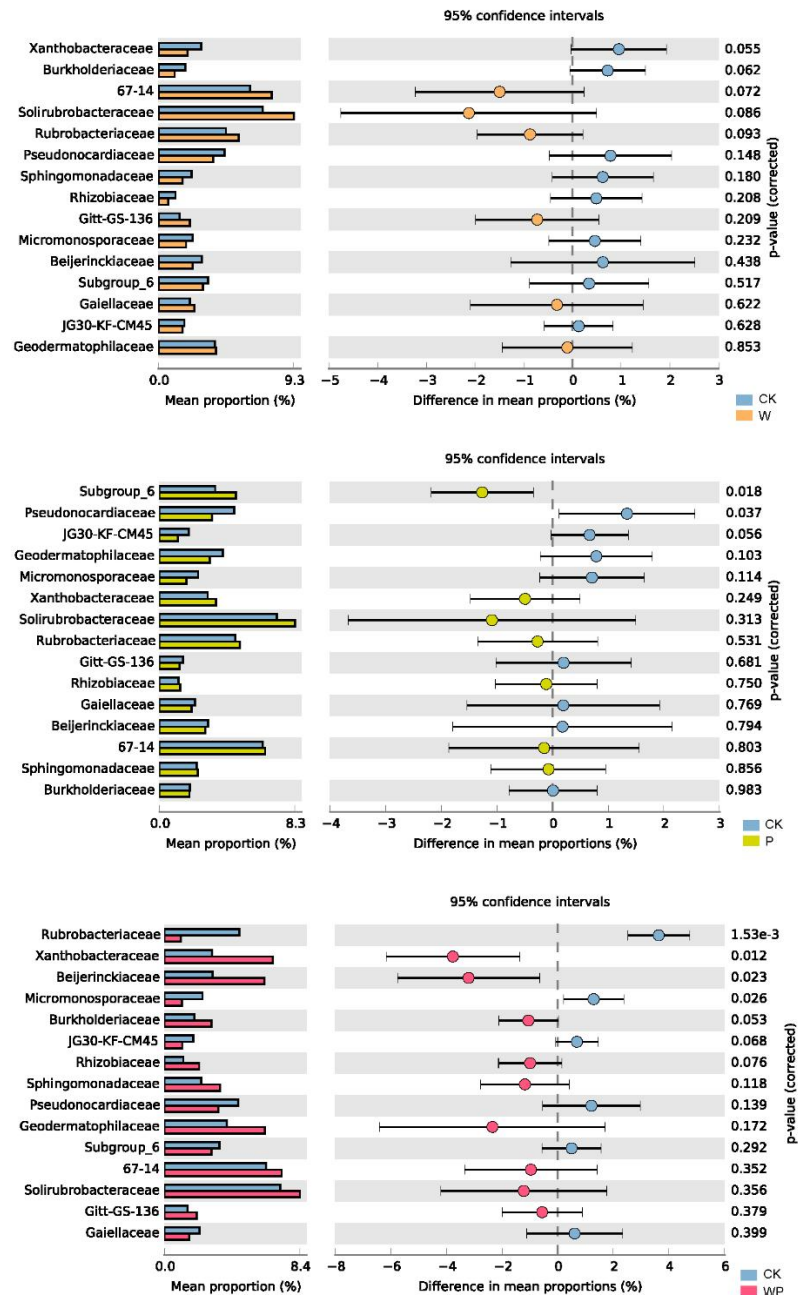

**Supplementary Figure S3.** Comparison of relative abundance of bacterial taxon at the family level between the control and the other three treatments. CK-control, W-warming, P-precipitation increasing, WP-the combination of warming and precipitation increase. The significance test was conducted based on the Welsh's T test at the 0.05 level.

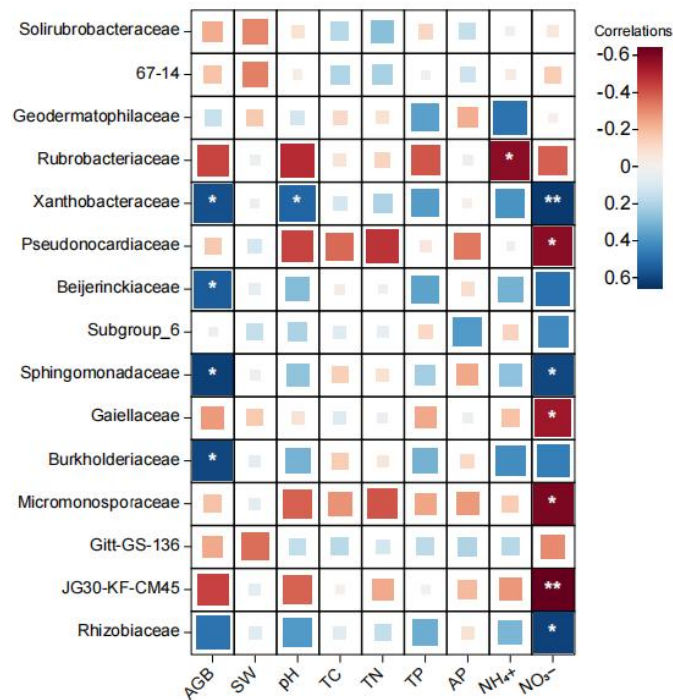

**Supplementary Figure S4.** Spearman correlations between the relative abundance of the top 15 bacterial families and environmental factors. AGB-Aboveground biomass, SW-soil water content, pH-soil pH, TC-soil total carbon content, TN-soil total nitrogen content, TP-soil total phosphorus content, AP- soil available phosphorus content, NH<sub>4</sub><sup>+</sup>- soil ammonium nitrogen content, NO<sub>3</sub><sup>-</sup> - soil nitrate nitrogen content.
